# Supplementary material for: Dual-Band Maritime Imagery Ship Classification Based on Multilayer Convolutional Feature Fusion
Source: Hindawi journal article supplement (doi:10.1155/2020/8891018), 2020-12-01
Supplement: f1 [file 8891018.f1.xlsx]

## Sheet: Fig.4
Influence of Original CNN Feature Produced by Two Feature Extractors for Each Band Image
One Layer	Images	Feature Extractor
		NO-FT	FT-VIS
C1	VIS	77.5956	78.5064
	IR	60.8379	60.6557
C2	VIS	79.9636	82.3315
	IR	61.7486	61.9308
C3	VIS	82.6958	83.2423
	IR	63.388	61.3843
C4	VIS	82.5137	85.0638
	IR	63.7523	61.5665
C5	VIS	81.9672	82.1494
	IR	64.1166	65.0273
F6	VIS	83.2423	83.9709
	IR	63.5701	67.7596
F7	VIS	82.3315	82.5137
	IR	62.4772	65.9381

## Sheet: Fig.5
Influence of the RNNs Number at F6 Layer of VGG-f Model
Number of RNNs	Images	Combination 1		Combination 2		Combination 3		Combination 1	Combination 2	Combination 3
		Mean	Std	Mean	Std	Mean	Std	Mean+Std	Mean+Std	Mean+Std
1	VIS	68.9107	2.4657	74.1311	2.57716	74.0109	2.14434	68.9±2.5	74.1±2.6	74.0±2.1
	IR	57.8215	2.45268	57.4499	2.62931	58.1348	2.98812	57.8±2.5	57.4±2.6	58.1±3.0
	CON	74.7942	1.80502	78.1494	2.39621	78.0474	2.05098	74.8±1.8	78.1±2.4	78.0±2.1
	SUM	70.7541	2.55915	74.6667	2.55747	75.6284	2.27028	70.8±2.6	74.7±2.6	75.6±2.3
2	VIS	75.643	2.30139	78.51	1.80187	78.1056	1.76983	75.6±2.3	78.5±1.8	78.1±1.8
	IR	59.5264	2.37864	59.592	2.51193	61.6357	1.95312	59.5±2.4	59.6±2.5	61.6±2.0
	CON	80.2259	1.85142	81.8579	1.77136	82.0291	1.63111	80.2±1.9	81.9±1.8	82.0±1.6
	SUM	77.2386	2.26579	79.4572	1.82272	80.5792	1.77705	77.2±2.3	79.5±1.8	80.6±1.8
4	VIS	79.9271	1.73506	81.5993	1.48367	81.7632	1.17911	79.9±1.7	81.6±1.5	81.8±1.2
	IR	61.7887	1.94458	62.1858	2.03666	64.867	2.15981	61.8±1.9	62.2±2.0	64.9±2.2
	CON	83.0638	1.50136	84.5137	1.47681	84.9107	1.21904	83.1±1.5	84.5±1.5	84.9±1.2
	SUM	81.6721	1.84031	83.5665	1.80667	84.0692	1.30326	81.7±1.8	83.6±1.8	84.1±1.3
8	VIS	82.7432	1.3252	83.6721	1.17918	83.6466	1.13143	82.7±1.3	83.7±1.2	83.6±1.1
	IR	63.9709	1.67833	63.4135	1.80619	66.4153	1.66857	64.0±1.7	63.4±1.8	66.4±1.7
	CON	84.9472	1.29049	86.4117	1.06019	86.5064	0.979758	84.9±1.3	86.4±1.1	86.5±1.0
	SUM	84.2149	1.17276	85.4572	1.20788	85.8215	1.03979	84.2±1.2	85.5±1.2	85.8±1.0
16	VIS	84.3133	0.833203	84.5064	0.895686	84.3424	0.887751	84.3±0.8	84.5±0.9	84.3±0.9
	IR	65.2131	1.59877	65.2823	1.41571	68.3789	1.66129	65.2±1.6	65.3±1.4	68.4±1.7
	CON	85.8834	0.840171	87.0565	0.75094	87.3224	1.00309	85.9±0.8	87.1±0.8	87.3±1.0
	SUM	85.5592	0.870094	86.6485	0.635528	86.8488	1.02578	85.6±0.9	86.6±0.6	86.8±1.0
32	VIS	84.9326	0.720222	84.9617	0.809728	84.7541	0.773889	84.9±0.7	85.0±0.8	84.8±0.8
	IR	66.4699	1.07971	66.3862	1.12658	69.5373	1.19503	66.5±1.1	66.4±1.1	69.5±1.2
	CON	86.8197	0.645581	87.439	0.739629	87.796	0.701129	86.8±0.6	87.4±0.7	87.8±0.7
	SUM	86.5902	0.753173	87.2095	0.80312	87.5556	0.764372	86.6±0.8	87.2±0.8	87.6±0.8
64	VIS	85.133	0.601189	85.0273	0.499176	85.0565	0.444592	85.1±0.6	85.0±0.5	85.1±0.4
	IR	67.1803	0.951606	66.9872	1.0301	70.0291	0.900812	67.2±1.0	67.0±1.0	70.0±0.9
	CON	87.1366	0.485268	87.694	0.659486	88.1967	0.544586	87.1±0.5	87.7±0.7	88.2±0.5
	SUM	86.9909	0.533393	87.5701	0.652674	88.1093	0.671572	87.0±0.5	87.6±0.7	88.1±0.7
128	VIS	85.5191	0.528496	85.1439	0.414973	85.133	0.452038	85.5±0.5	85.1±0.4	85.1±0.5
	IR	67.5009	0.975082	67.5519	0.855156	70.3607	0.785862	67.5±1.0	67.6±0.9	70.4±0.8
	CON	87.2969	0.354521	87.8506	0.534864	88.3497	0.500476	87.3±0.4	87.9±0.5	88.3±0.5
	SUM	87.2605	0.507796	87.796	0.63739	88.3206	0.479301	87.3±0.5	87.8±0.6	88.3±0.5

## Sheet: Fig.6(a)
Original CNN Feature Fusion on Single Layer of Three Combinations in VIS and IR images
One Layer	Images	Combination 1	Combination 2	Combination 3
C1	VIS	77.5956	78.5064	78.5064
	IR	60.8379	60.8379	60.6557
	CON	78.6885	79.4171	79.235
	SUM	76.867	77.5956	77.2313
C2	VIS	79.9636	82.3315	82.3315
	IR	61.7486	61.7486	61.9308
	CON	82.5137	83.6066	83.0601
	SUM	80.51	83.2423	82.3315
C3	VIS	82.6958	83.2423	83.2423
	IR	63.388	63.388	61.3843
	CON	85.0638	85.2459	86.3388
	SUM	83.7887	85.7923	83.6066
C4	VIS	82.5137	85.0638	85.0638
	IR	63.7523	63.7523	61.5665
	CON	85.6102	85.2459	85.7923
	SUM	84.153	84.5173	83.2423
C5	VIS	81.9672	82.1494	82.1494
	IR	64.1166	64.1166	65.0273
	CON	84.5173	84.8816	84.5173
	SUM	85.2459	84.8816	85.0638
F6	VIS	83.2423	83.9709	83.9709
	IR	63.5701	63.5701	67.7596
	CON	85.4281	85.2459	85.6102
	SUM	84.6995	85.4281	84.8816
F7	VIS	82.3315	82.5137	82.5137
	IR	62.4772	62.4772	65.9381
	CON	84.153	83.6066	83.4244
	SUM	81.7851	83.7887	83.4244

## Sheet: Fig.6(b)
CNN-RNN Single Layer Feature Fusion of Three Combinations in VIS and IR images
One Layer	Images	Combination 1		Combination 2		Combination 3		Combination 1	Combination 2	Combination 3
		Mean	Std	Mean	Std	Mean	Std	Mean+Std	Mean+Std	Mean+Std
C1	VIS	74.1712	1.57639	72.7869	1.40804	72.663	1.46037	74.2±1.6	72.8±1.4	72.7±1.5
	IR	62.561	1.6626	61.6758	1.72253	56.3242	2.02642	62.6±1.7	61.7±1.7	56.3±2.0
	CON	76.2441	1.05833	75.3552	1.10904	74.3679	1.29535	76.2±1.1	75.4±1.1	74.4±1.3
	SUM	75.1257	1.27805	74.3752	1.31321	73.5118	1.40568	75.1±1.3	74.4±1.3	73.5±1.4
C2	VIS	80.0874	0.831413	80.0073	0.915981	80.5027	0.968721	80.1±0.8	80.0±0.9	80.5±1.0
	IR	69.235	0.975193	69.5774	0.992563	67.1184	1.3447	69.2±1.0	69.6±1.0	67.1±1.3
	CON	79.3042	0.763885	79.1767	0.674992	79.694	0.733451	79.3±0.8	79.2±0.7	79.7±0.7
	SUM	79.3843	0.817658	79.2678	0.869821	79.5301	0.889222	79.4±0.8	79.3±0.9	79.5±0.9
C3	VIS	81.2568	1.10415	82.4772	1.18447	82.3206	1.09994	81.3±1.1	82.5±1.2	82.3±1.1
	IR	69.6175	0.988126	69.7814	1.14035	67.7486	1.36378	69.6±1.0	69.8±1.1	67.7±1.4
	CON	81.4426	0.857236	81.031	0.929519	81.5556	0.925723	81.4±0.9	81.0±0.9	81.6±0.9
	SUM	81.2423	1.10429	80.8124	1.16232	81.1002	0.811732	81.2±1.1	80.8±1.2	81.1±0.8
C4	VIS	81.031	1.08232	82.5173	1.40442	82.3497	1.13439	81.0±1.1	82.5±1.4	82.3±1.1
	IR	70.2514	0.932014	70.3315	1.17104	67.7049	1.22618	70.3±0.9	70.3±1.2	67.7±1.2
	CON	82.2113	0.744783	81.2095	0.910643	81.6211	0.870257	82.2±0.7	81.2±0.9	81.6±0.9
	SUM	81.9745	0.974991	80.8743	1.00511	81.2204	0.977274	82.0±1.0	80.9±1.0	81.2±1.0
C5	VIS	84.2769	1.00406	85.1949	1.02779	85.5228	0.92164	84.3±1.0	85.2±1.0	85.5±0.9
	IR	71.2678	0.972801	71.0018	0.839163	69.2896	1.0415	71.3±1.0	71.0±0.8	69.3±1.0
	CON	84.4517	0.755749	85.5592	0.864629	87.2678	0.773013	84.5±0.8	85.6±0.9	87.3±0.8
	SUM	84.1712	0.798011	85.2787	0.875254	86.8197	0.811899	84.2±0.8	85.3±0.9	86.8±0.8
F6	VIS	84.6885	0.809937	84.8561	0.736004	84.867	0.703866	84.7±0.8	84.9±0.7	84.9±0.7
	IR	66.1639	1.10984	66.3534	1.25661	69.2568	1.14865	66.2±1.1	66.4±1.3	69.3±1.1
	CON	86.714	0.562217	87.3953	0.826971	87.847	0.584224	86.7±0.6	87.4±0.8	87.8±0.6
	SUM	86.4408	0.636497	87.439	0.698187	87.6029	0.659742	86.4±0.6	87.4±0.7	87.6±0.7
F7	VIS	84.0109	0.70909	83.4973	0.57483	83.5301	0.491094	84.0±0.7	83.5±0.6	83.5±0.5
	IR	62.6375	0.967098	62.8561	1.21151	67.0929	1.20914	62.6±1.0	62.9±1.2	67.1±1.2
	CON	85.2896	0.573131	84.8197	0.50539	85.4026	0.803727	85.3±0.6	84.8±0.5	85.4±0.8
	SUM	85.082	0.532326	84.7687	0.585208	85.4026	0.873178	85.1±0.5	84.8±0.6	85.4±0.9

## Sheet: Table3
CNN-RNN Two/Three Layers Feature Fusion of Three Combinations in VIS and IR images
Multi-Layers Fusion	Images	Combination 1		Combination 2		Combination 3		Combination 1	Combination 2	Combination 3
		Mean	Std	Mean	Std	Mean	Std	Mean+Std	Mean+Std	Mean+Std
C2+F6	VIS	86.9872	0.685661	86.4809	0.649273	86.6302	0.684515	87.0±0.7	86.5±0.6	86.6±0.7
	IR	71.4536	0.883224	71.5993	0.804426	69.5665	1.16884	71.5±0.9	71.6±0.8	69.6±1.2
	CON	86.5027	0.672791	88.9399	0.629953	89.0419	0.532465	86.5±0.7	88.9±0.6	89.0±0.5
	SUM	86.2696	0.801939	88.7031	0.730908	88.7577	0.678593	86.3±0.8	88.7±0.7	88.8±0.7
C3+F6	VIS	86.6995	0.722522	86.9144	0.792144	86.8233	0.716046	86.7±0.7	86.9±0.8	86.8±0.7
	IR	71.3151	0.703289	71.2423	0.887507	70.1311	1.04636	71.3±0.7	71.2±0.9	70.1±1.0
	CON	86.6193	0.712823	89.0528	0.61164	89.1439	0.475557	86.6±0.7	89.1±0.6	89.1±0.5
	SUM	86.5647	0.802504	88.8597	0.757181	88.9581	0.614555	86.6±0.8	88.9±0.8	89.0±0.6
C4+F6	VIS	86.8452	0.575172	86.4663	0.693604	86.6266	0.708899	86.8±0.6	86.5±0.7	86.6±0.7
	IR	71.439	0.893862	71.4171	0.958094	69.7341	0.989742	71.4±0.9	71.4±1.0	69.7±1.0
	CON	86.1712	0.690267	88.8342	0.566823	89.0565	0.460864	86.2±0.7	88.8±0.6	89.1±0.5
	SUM	86.0546	0.813066	88.5282	0.590507	88.7942	0.488536	86.1±0.8	88.5±0.6	88.8±0.5
C5+F6	VIS	85.6539	0.652674	85.8579	0.653918	86.0036	0.56336	85.7±0.7	85.9±0.7	86.0±0.6
	IR	70.9982	0.875718	71.1184	0.810564	70.5137	0.881382	71.0±0.9	71.1±0.8	70.5±0.9
	CON	87.2532	0.693838	88.9035	0.581669	88.5974	0.555664	87.3±0.7	88.9±0.6	88.6±0.6
	SUM	86.8379	0.716235	88.7505	0.654746	88.4372	0.653379	86.8±0.7	88.8±0.7	88.4±0.7
C2+C5+F6	VIS	86.4991	0.649638	86.5865	0.651844	86.8015	0.738025	86.5±0.6	86.6±0.7	86.8±0.7
	IR	71.5301	0.776509	71.7304	0.647926	70.2332	0.882496	71.5±0.8	71.7±0.6	70.2±0.9
	CON	86.2659	0.570099	88.9508	0.639098	89.3698	0.543042	86.3±0.6	89.0±0.6	89.4±0.5
	SUM	86.1967	0.639818	88.7832	0.716499	89.1148	0.522452	86.2±0.6	88.8±0.7	89.1±0.5
C3+C5+F6	VIS	86.5027	0.481539	87.1767	0.671734	87.1949	0.529662	86.5±0.5	87.2±0.7	87.2±0.5
	IR	71.8397	0.596135	71.4026	0.536233	70	0.718663	71.8±0.6	71.4±0.5	70.0±0.7
	CON	86.2295	0.859519	89.3989	0.476537	89.2532	0.384005	86.2±0.9	89.4±0.5	89.3±0.4
	SUM	85.8652	1.10364	89.1439	0.783219	89.0893	0.496615	85.9±1.1	89.1±0.8	89.1±0.5
C4+C5+F6	VIS	86.5938	0.502151	87.031	0.895645	86.8306	0.515554	86.6±0.5	87.0±0.9	86.8±0.5
	IR	71.1111	0.494755	72.2222	0.925801	70.4918	0.73364	71.1±0.5	72.2±0.9	70.5±0.7
	CON	86.102	0.486111	89.2532	0.402747	89.0893	0.566	86.1±0.5	89.3±0.4	89.1±0.6
	SUM	85.7013	0.773986	89.0346	0.675018	88.8889	0.500681	85.7±0.8	89.0±0.7	88.9±0.5

## Sheet: FeatureFusion-all
CNN-RNN Feature Fusion of Three Combinations in VIS and IR images (All)
Layers	Combination 1				Combination 2				Combination 3
	VIS	IR	CON	SUM	VIS	IR	CON	SUM	VIS	IR	CON	SUM
C1	74.2±1.6	62.6±1.7	76.2±1.1	75.1±1.3	72.8±1.4	61.7±1.7	75.4±1.1	74.4±1.3	72.7±1.5	56.3±2.0	74.4±1.3	73.5±1.4
C2	80.1±0.8	69.2±1.0	79.3±0.8	79.4±0.8	80.0±0.9	69.6±1.0	79.2±0.7	79.3±0.9	80.5±1.0	67.1±1.3	79.7±0.7	79.5±0.9
C3	81.3±1.1	69.6±1.0	81.4±0.9	81.2±1.1	82.5±1.2	69.8±1.1	81.0±0.9	80.8±1.2	82.3±1.1	67.7±1.4	81.6±0.9	81.1±0.8
C4	81.0±1.1	70.3±0.9	82.2±0.7	82.0±1.0	82.5±1.4	70.3±1.2	81.2±0.9	80.9±1.0	82.3±1.1	67.7±1.2	81.6±0.9	81.2±1.0
C5	84.3±1.0	71.3±1.0	84.5±0.8	84.2±0.8	85.2±1.0	71.0±0.8	85.6±0.9	85.3±0.9	85.5±0.9	69.3±1.0	87.3±0.8	86.8±0.8
F6	84.7±0.8	66.2±1.1	86.7±0.6	86.4±0.6	84.9±0.7	66.4±1.3	87.4±0.8	87.4±0.7	84.9±0.7	69.3±1.1	87.8±0.6	87.6±0.7
F7	84.0±0.7	62.6±1.0	85.3±0.6	85.1±0.5	83.5±0.6	62.9±1.2	84.8±0.5	84.8±0.6	83.5±0.5	67.1±1.2	85.4±0.8	85.4±0.9
C2+F6	87.0±0.7	71.5±0.9	86.5±0.7	86.3±0.8	86.5±0.6	71.6±0.8	88.9±0.6	88.7±0.7	86.6±0.7	69.6±1.2	89.0±0.5	88.8±0.7
C3+F6	86.7±0.7	71.3±0.7	86.6±0.7	86.6±0.8	86.9±0.8	71.2±0.9	89.1±0.6	88.9±0.8	86.8±0.7	70.1±1.0	89.1±0.5	89.0±0.6
C4+F6	86.8±0.6	71.4±0.9	86.2±0.7	86.1±0.8	86.5±0.7	71.4±1.0	88.8±0.6	88.5±0.6	86.6±0.7	69.7±1.0	89.1±0.5	88.8±0.5
C5+F6	85.7±0.7	71.0±0.9	87.3±0.7	87.3±0.7	85.9±0.7	71.1±0.8	88.9±0.6	88.8±0.7	86.0±0.6	70.5±0.9	88.6±0.6	88.4±0.7
C2+C5+F6	86.5±0.6	71.5±0.8	86.3±0.6	86.2±0.6	86.6±0.7	71.7±0.6	89.0±0.6	88.8±0.7	86.8±0.7	70.2±0.9	89.4±0.5	89.1±0.5
C3+C5+F6	86.5±0.5	71.8±0.6	86.2±0.9	85.9±1.1	87.2±0.7	71.4±0.5	89.4±0.5	89.1±0.8	87.2±0.5	70.0±0.7	89.3±0.4	89.1±0.5
C4+C5+F6	86.6±0.5	71.1±0.5	86.1±0.5	85.7±0.8	87.0±0.9	72.2±0.9	89.3±0.4	89.0±0.7	86.8±0.5	70.5±0.7	89.1±0.6	88.9±0.5
